# Supplementary material for: The occurrence of infection-related systemic diseases in Korean children and adolescents has decreased after the spread of the COVID-19 pandemic: a multicenter retrospective study
Source: PubMed Central journal article supplement — Transl Pediatr. 2021 Nov;10(11):2888–96. doi: 10.21037/tp-21-315 (PMC8649603; doi:10.21037/tp-21-315), 2021-11
Supplement: tp-10-11-2888-dss.pdf [file tp-10-11-2888-dss.pdf]

## Data Sharing Statement

|                     |                                                                                                                                                     |                                                                                                                                                                                                                                                          |
|---------------------|-----------------------------------------------------------------------------------------------------------------------------------------------------|----------------------------------------------------------------------------------------------------------------------------------------------------------------------------------------------------------------------------------------------------------|
| <b>Article Info</b> | https://dx.doi.org/10.21037/tp-21-315                                                                                                               |                                                                                                                                                                                                                                                          |
| <b>Item</b>         | <b>Question</b>                                                                                                                                     | <b>Authors' Response<br/>(place "-" if not applicable)</b>                                                                                                                                                                                               |
| 1                   | Would you like to share data collected for your study to others?                                                                                    | Yes                                                                                                                                                                                                                                                      |
| 2                   | If not, would you like to share the reason for your decision?                                                                                       | -                                                                                                                                                                                                                                                        |
| 3                   | What data in particular will be shared?                                                                                                             | Number of patients diagnosed from each hospital for each disease during the study period.<br>The annual occurrence rate for each disease.<br>95% CIs of the annual occurrence rate for each disease, calculated according to the Clopper–Pearson method. |
| 4                   | Any other documents will be shared? Such as study protocol, statistical analysis plan, informed consent form, clinical study report, analytic code. | Statistical analysis plan, clinical study report will be also shared if requested.                                                                                                                                                                       |
| 5                   | When will data availability begin?                                                                                                                  | From the publication date                                                                                                                                                                                                                                |
| 6                   | When will data availability end?                                                                                                                    | Two years within the publication date.                                                                                                                                                                                                                   |
| 7                   | To whom will you share the data?                                                                                                                    | Pediatricians who are interested in this study.                                                                                                                                                                                                          |
| 8                   | For what type of analysis or purpose?                                                                                                               | For analysis of the incidence of infection-related systemic disease in the pediatric population                                                                                                                                                          |
| 9                   | How or where can the data/documents be obtained?                                                                                                    | Emails could be sent to the address below to obtain the shared data:<br><a href="mailto:benkang@knu.ac.kr">benkang@knu.ac.kr</a>                                                                                                                         |
| 10                  | Any other restrictions?                                                                                                                             | We may balance the potential benefits and risks for each request and then provide the data that could be shared.                                                                                                                                         |
